# Supplementary material for: Mitochondrial Dysfunction and Protein Homeostasis in Aging: Insights from a Premature-Aging Mouse Model
Source: MDPI journal article supplement (doi:10.3390/biom14020162), 2024-01-30

Figure S2: Original western blots.

$\beta 1$

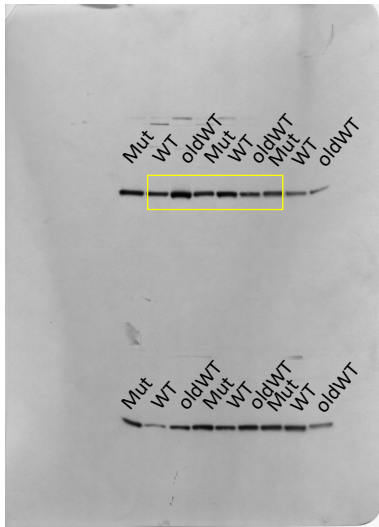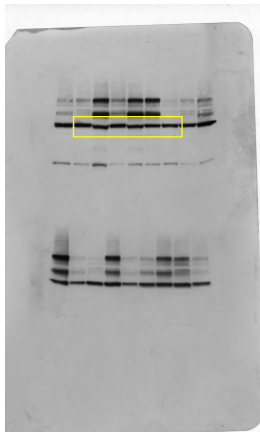

actin

$\beta 2$

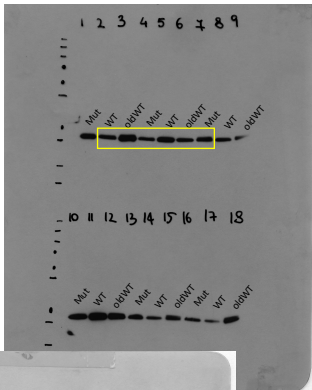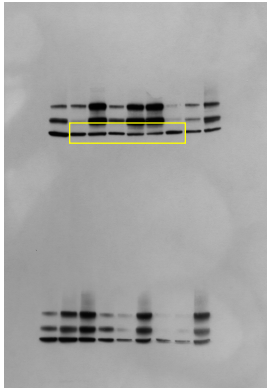

actin

$\beta 5$

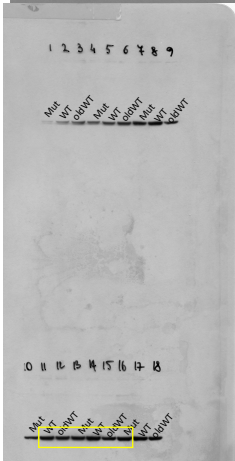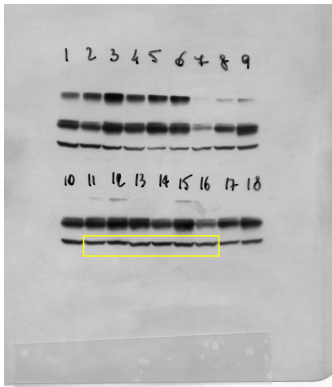

actin

Fig1

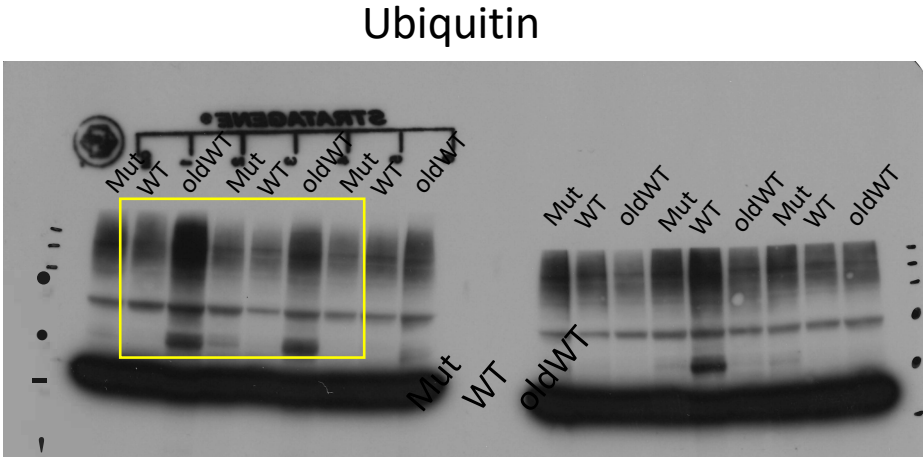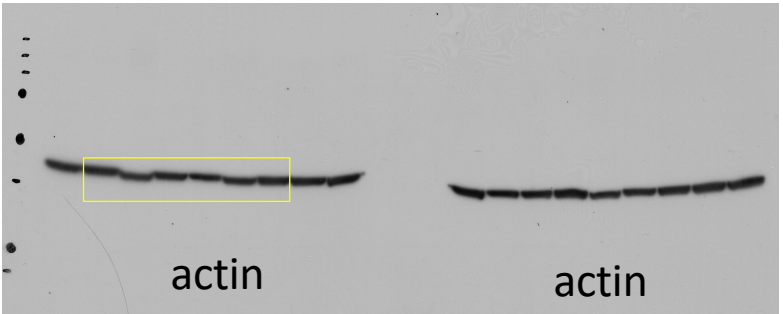

actin

actin

$\beta 1$

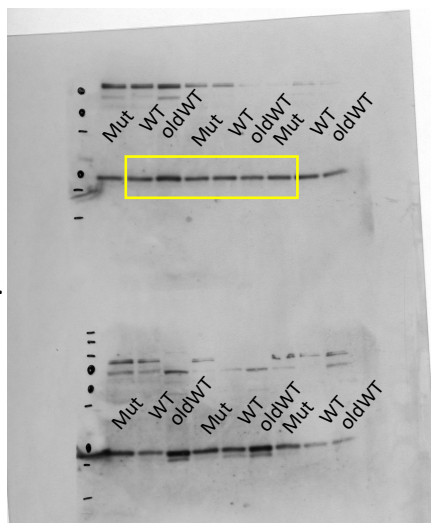

actin

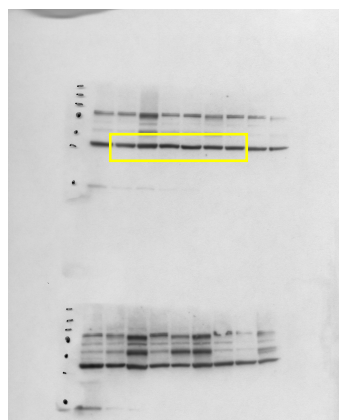

$\beta 2$

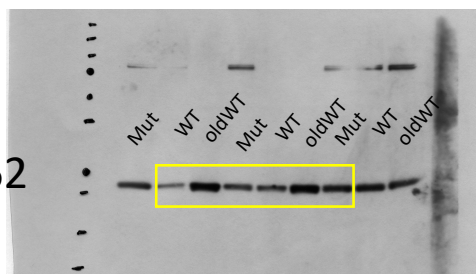

actin

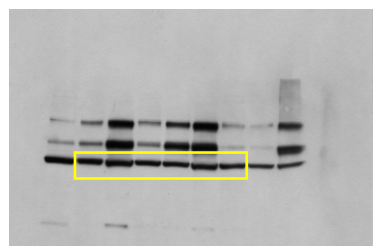

$\beta 5$

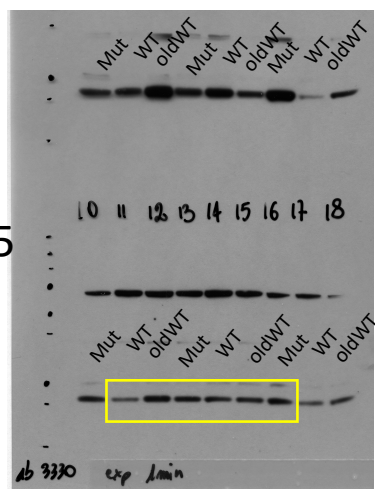

actin

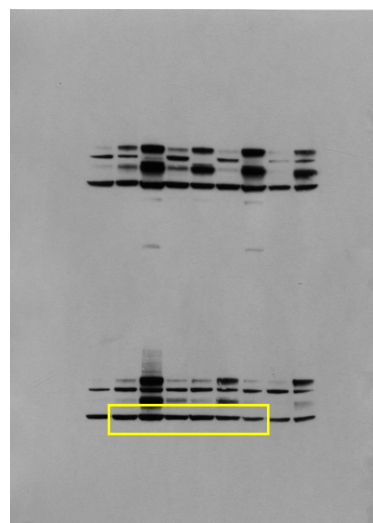

Ubiquitin

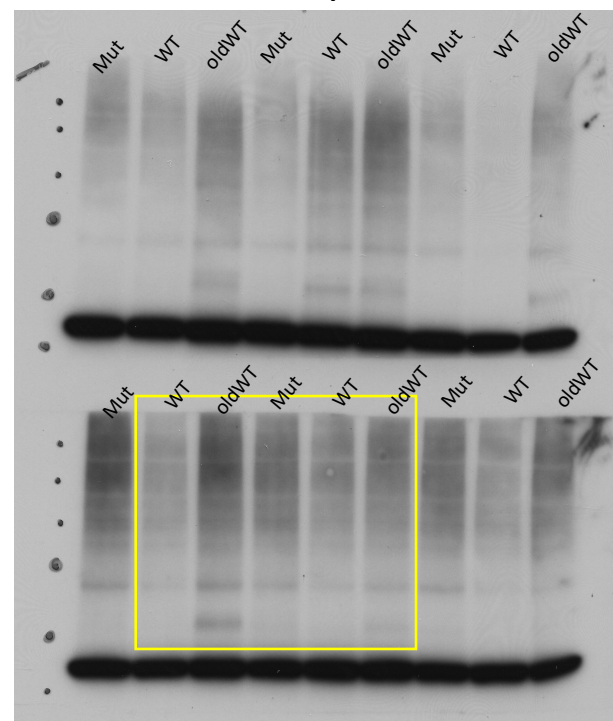

actin

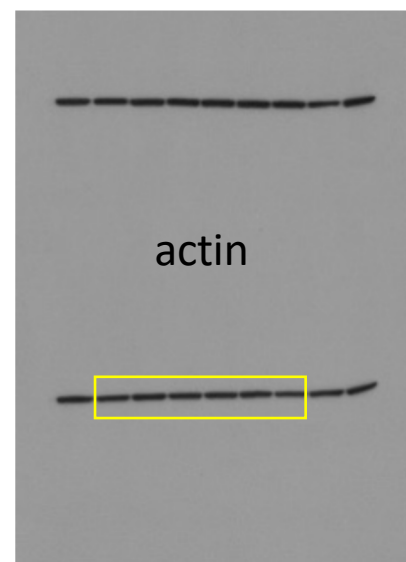



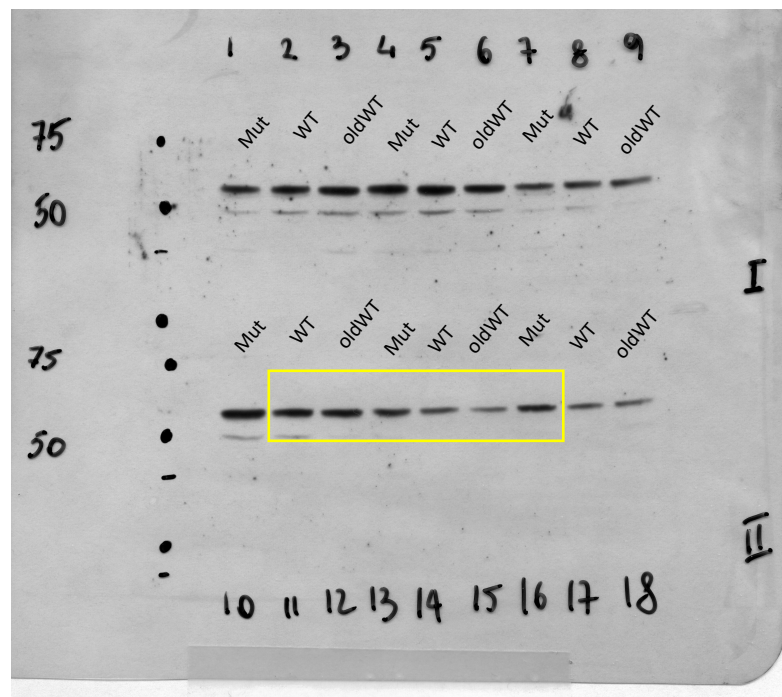

p62

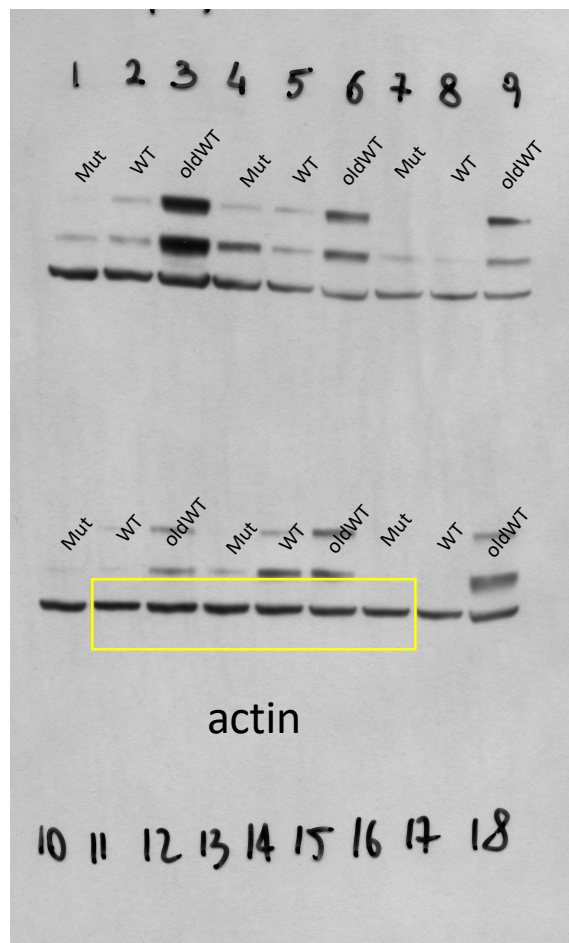

actin

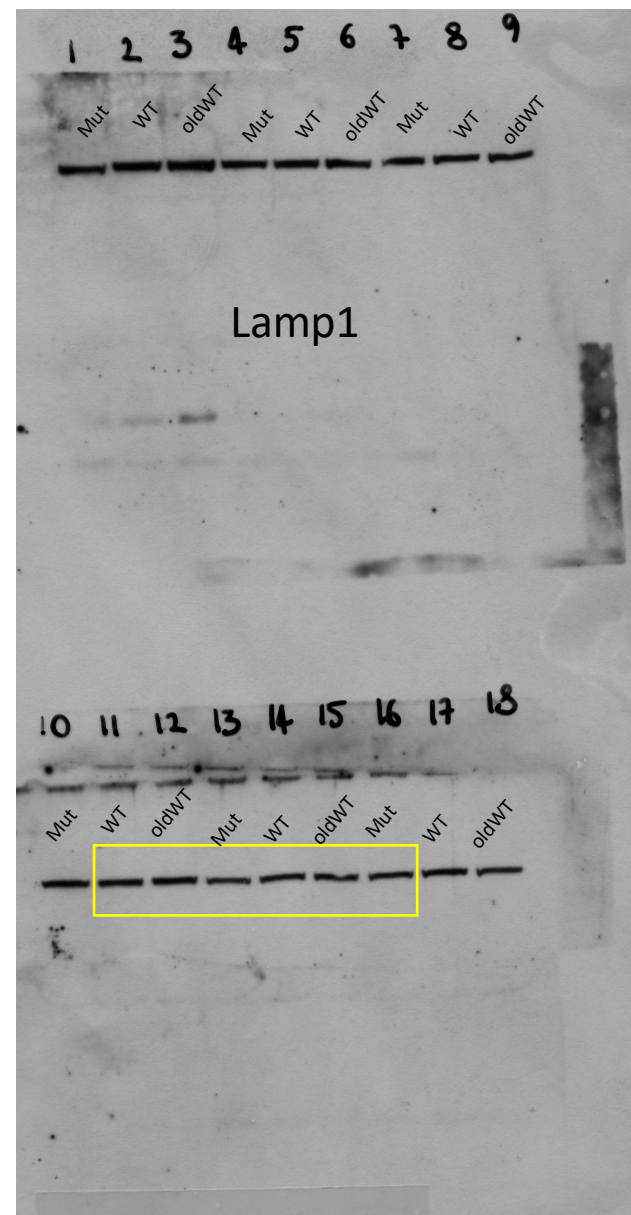

Lamp1

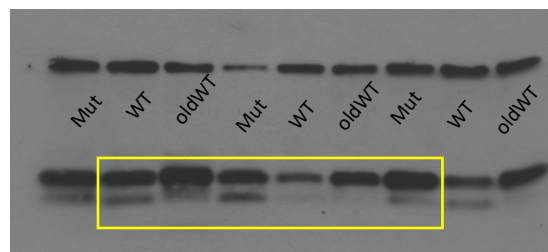

LC3B

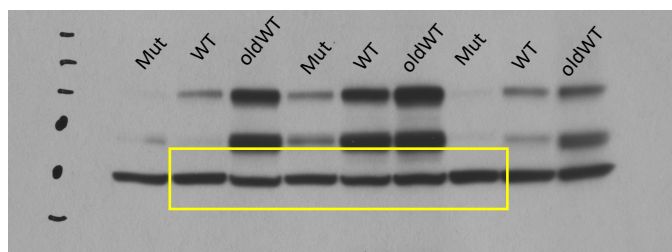

actin

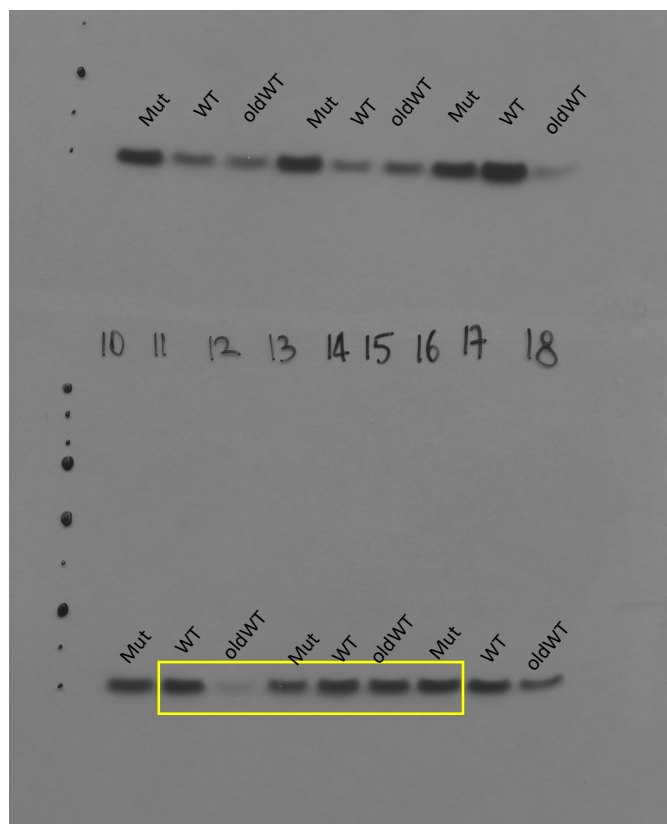

LC3B

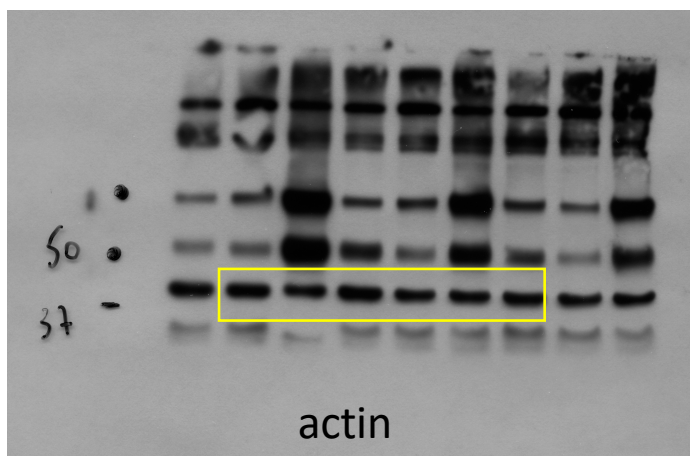

actin

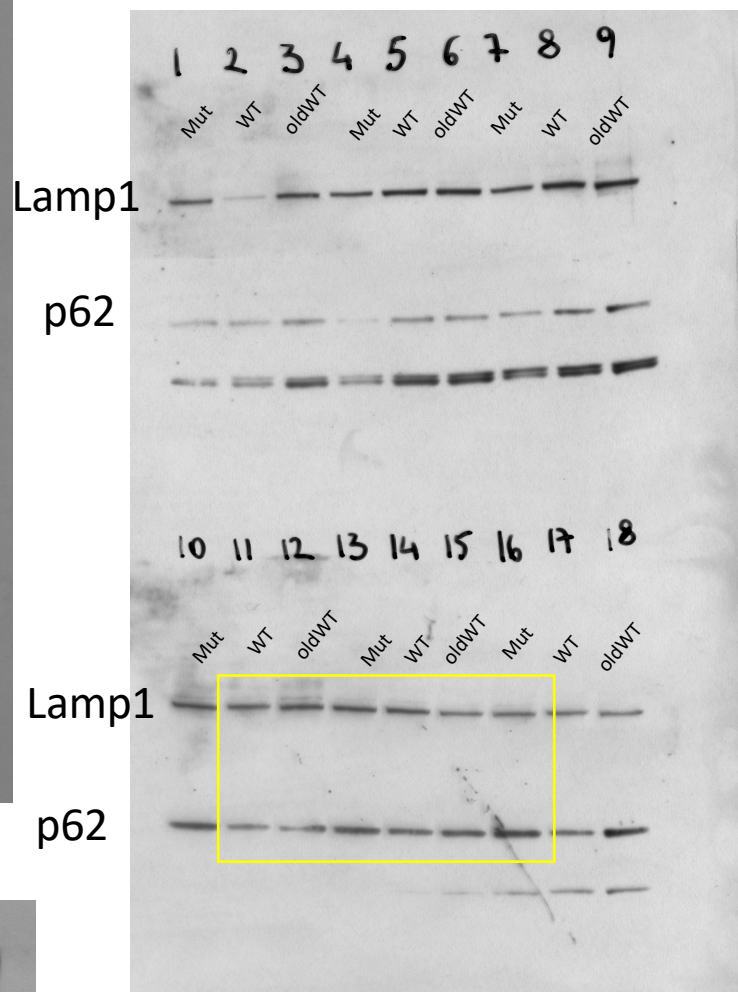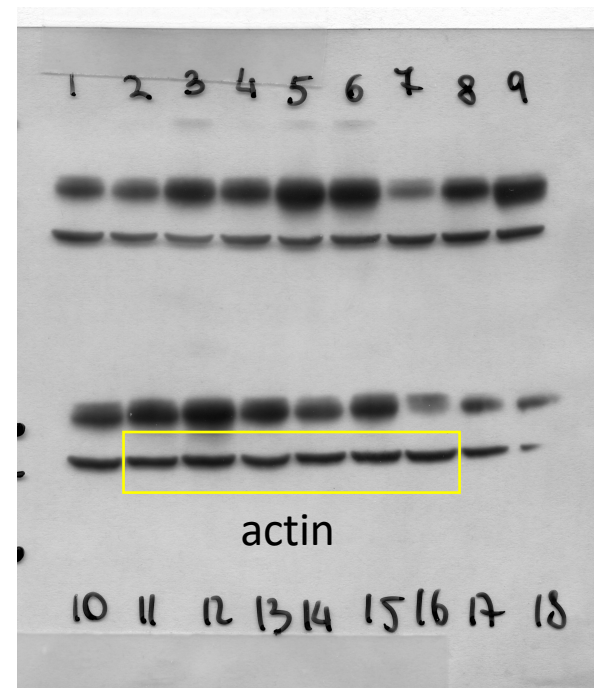

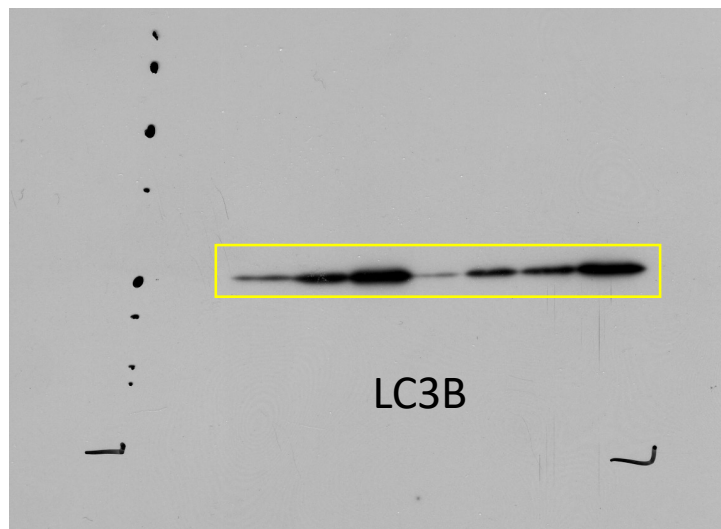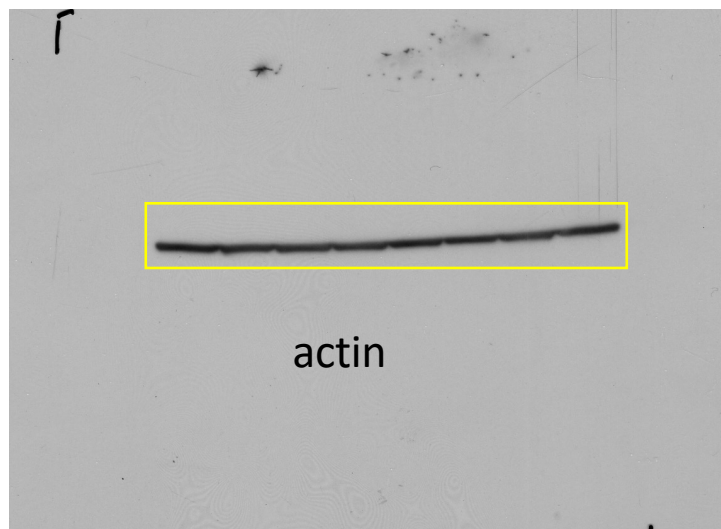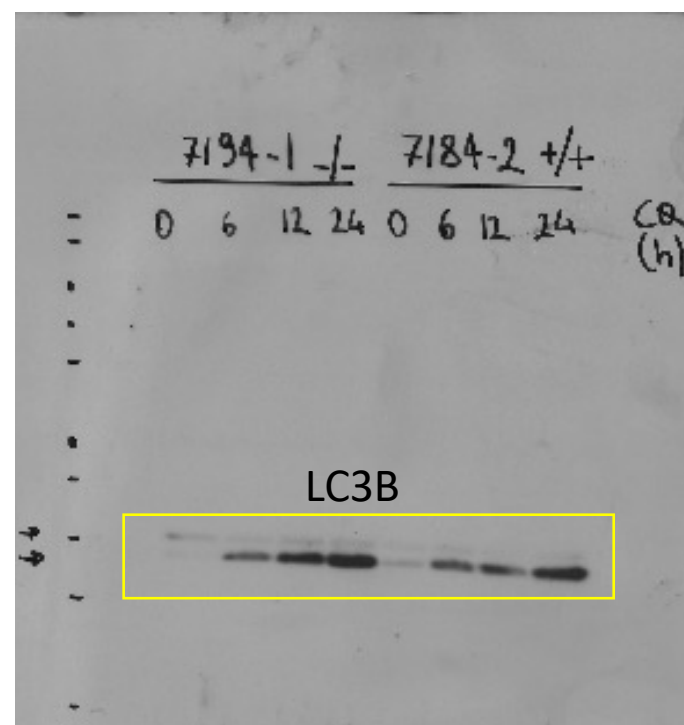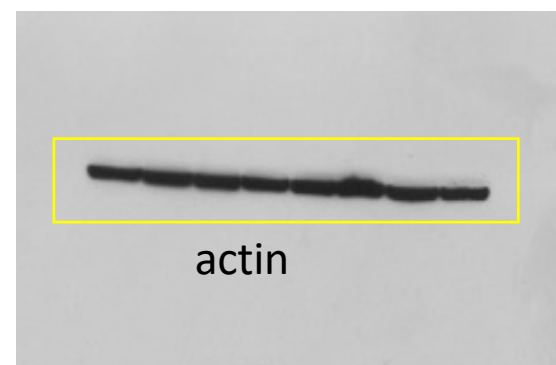

Supplement: s1 [file s1]
