# Supplementary material for: Mitochondrial Dysfunction and Protein Homeostasis in Aging: Insights from a Premature-Aging Mouse Model
Source: MDPI journal article supplement (doi:10.3390/biom14020162), 2024-01-30
Supplement: s1 [file s1]

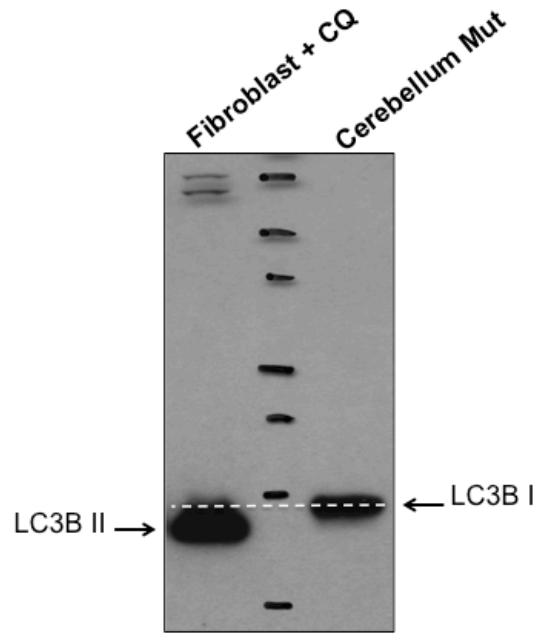

**Figure S1.** Western blot was used to compare the LC3B II accumulation in chloroquine-treated fibroblast lysates with cerebellar lysates from mtDNA mutator mouse. The size difference of the two protein bands suggests that the protein present in the cerebellar lysate is LC3B I and not II.
